# Supplementary material for: Alternative splicing events expand molecular diversity of camel CSN1S2 increasing its ability to generate potentially bioactive peptides
Source: PubMed Central journal article supplement (PMC6437144; doi:10.1038/s41598-019-41649-5), 2019-03-27
Supplement: 41598_2019_41649_MOESM1_ESM.pdf [file 41598_2019_41649_MOESM1_ESM.pdf]

Alternative splicing events expand molecular diversity of camel CSN1S2 increasing its ability to generate potentially bioactive peptides

Ryskaliyeva A, Henry C, Miranda G, Faye B, Konuspayeva G and Martin P

**Supplementary figure 1 (S1)**

Bioanalyser profile of camel CSN1S2 PCR products

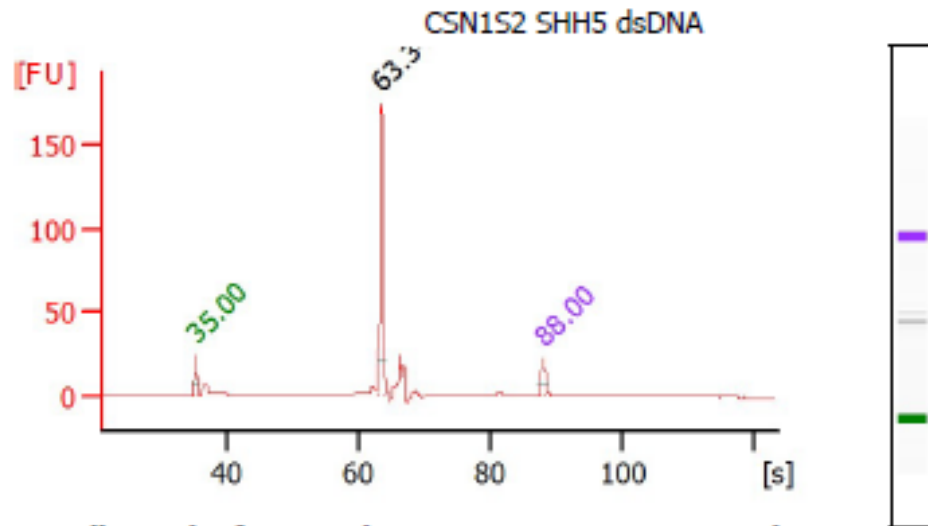

**Overall Results for sample 4 :** CSN1S2 SHH5 dsDNA

Number of peaks found: 1

**Peak table for sample 4 :** CSN1S2 SHH5 dsDNA

| Peak | Size [bp] | Conc. [ng/μl] | Molarity [nmol/l] | Observations |
|------|-----------|---------------|-------------------|--------------|
| 1    | 50        | 8.30          | 251.5             | Lower Marker |
| 2    | 615       | 30.01         | 74.0              |              |
| 3    | 10,380    | 4.20          | 0.6               | Upper Marker |



Digestion profile of the camel CSN1S2 sv1 (187 aa), including exon 13, by Pepsin (pH1.3) +Chymotrypsin-high specificity (C-term to [FYW], not before P) + Trypsin

```

          Tryps
          Tryps|
            Tryps  ||
              Ch hi Pn1.3|  ||  Ch hi Pn1.3  Tryps
Tryps      Pn1.3 Tryps||  ||  Tryps Pn1.3| Tryps  |
|
|
|
1  KHEMDQGSSEESINVSQQKFKQVKKVAIHPSKEDICSTFCEEAVRNIKEVESAEVPTEN  60
-----+-----+-----+-----+-----+-----+-----+-----+-----+-----+
          Pn1.3
          Pn1.3|
            Pn1.3 ||
              Ch hi Pn1.3|  ||
Ch hi Pn1.3  ||  ||
          Tryps|  ||  ||
            Ch hi|  ||  ||
          Tryps||  ||  ||
            Ch hi  ||  ||  ||  Ch hi
Ch hi Pn1.3|  ||  ||  ||  Pn1.3|
          Pn1.3|  ||  ||  ||  Tryps  ||
Tryps  ||  ||  ||  ||  Tryps  |  ||  Pn1.3
          Ch hi  |  |  |  Pn1.3|
|
|
|
61  KISQFYQKWKFLQYLQALHQGQIVMNPWDQGKTRAYPFIPVNTQQLSISEESTEVPTEE  120
-----+-----+-----+-----+-----+-----+-----+-----+
                                                    Ch hi
                                                    Tryps
                                                    Ch hi |
                                                    Ch hi | |
                                                    Tryps  | | |
                                                    Pn1.3| | | |
                                                    Ch hi Pn1.3|| | | |
                                                    Ch hi Pn1.3 || | | |
                                                    Pn1.3| | | | |
                                                    Ch hi  || | | |
                                                    Ch hi  || | | |
                                                    Ch hi  || | | |
                                                    Tryps  | | | |
                                                    Ch hi Pn1.3 | | | | |
                                                    Tryps| | | | |
                                                    Tryps  || | | | |
                                                    Pn1.3  | | | | |
                                                    Tryps  | | | | |
                                                    Tryps| | | | |
                                                    Ch hi Pn1.3 || | | |
                                                    Tryps  | | | | |
                                                    Tryps| | | | |
                                                    Pn1.3| | | | |
|
|
|
121  NSKKTVDMESTEVEFTKKTELTEEEKDHQKFLNKIYQYYQTFWLWPEYLLKTVYQYQKTMTPW  180
-----+-----+-----+-----+-----+-----+-----+-----+
          Ch hi
          Tryps|
          Tryps||
|
|
|
181  NHIKRYF  187
-----

```
